# Supplementary material for: Deep Sequencing Whole Transcriptome Exploration of the σE Regulon in Neisseria meningitidis
Source: PLoS One. 2011 Dec 15;6(12):e29002. doi: 10.1371/journal.pone.0029002 (PMC3240639; doi:10.1371/journal.pone.0029002)
Supplement: Table S1 — List of primers used in qRT-PCR experiments. (XLS) [file pone.0029002.s001.xls]

## Sheet: Sheet1
RH_NMH_2477_FW1	agcctatttccaacgcatcg
RH_NMH_2477_RV2	gtcgtattcgtggctgaagg
RH_NMH_2270_FW1	agcacttgccacactgattg
RH_NMH_2270_RV2	tgacagtgttgactttgccg
RH_NMH_2253_FW3	cttcttctaccgttccgcac
RH_NMH_2253_RV4	tttttcggatgcagaggctg
RH_NMH_0518_FW3	gcaacggtacaacctctgtc
RH_NMH_0518_RV4	ccgtcattcaatacctcgcc
RH_NMH_2149_FW1	gctggttttgcgtctgtttg
RH_NMH_2149_RV2	ttttcagcagcgtatccagc
CT-class4-1	caaacagctgaaattaagcgc
CT-class4-2	gtgatgattgtgtgccggc
